# Supplementary material for: Ag decorated topological surface state protected hierarchical Bi2Se3nanoflakes for enhanced field emission properties
Source: Royal Society of Chemistry journal article supplement (doi:10.1039/c4tc02035a), 2015-01-01
Supplement: c4tc02035a1.pdf [file c4tc02035a1.pdf]

## **Supporting Information**

### **Ag Decorated Topological Surface State Protected Hierarchical Bi<sub>2</sub>Se<sub>3</sub> Nanoflakes for Enhanced Field Emission Property**

Biswajit Das<sup>a</sup>, Debabrata Sarkar<sup>b</sup>, Supratim Maity<sup>b</sup> and Kalyan Kumar Chattopadhyay<sup>a,b\*</sup>

<sup>a</sup>School of Material Science & Nanotechnology, Jadavpur University, Kolkata 700 032, India

<sup>b</sup>Thin Film & Nanoscience Laboratory, Department of Physics, Jadavpur University, Kolkata 700 032, India

\*Corresponding author. Tel.: +91 9433389445; fax: +91 33 2414 600.

E-mail address: [kalyan\\_chattopadhyay@yahoo.com](mailto:kalyan_chattopadhyay@yahoo.com) (Kalyan Kumar Chattopadhyay).

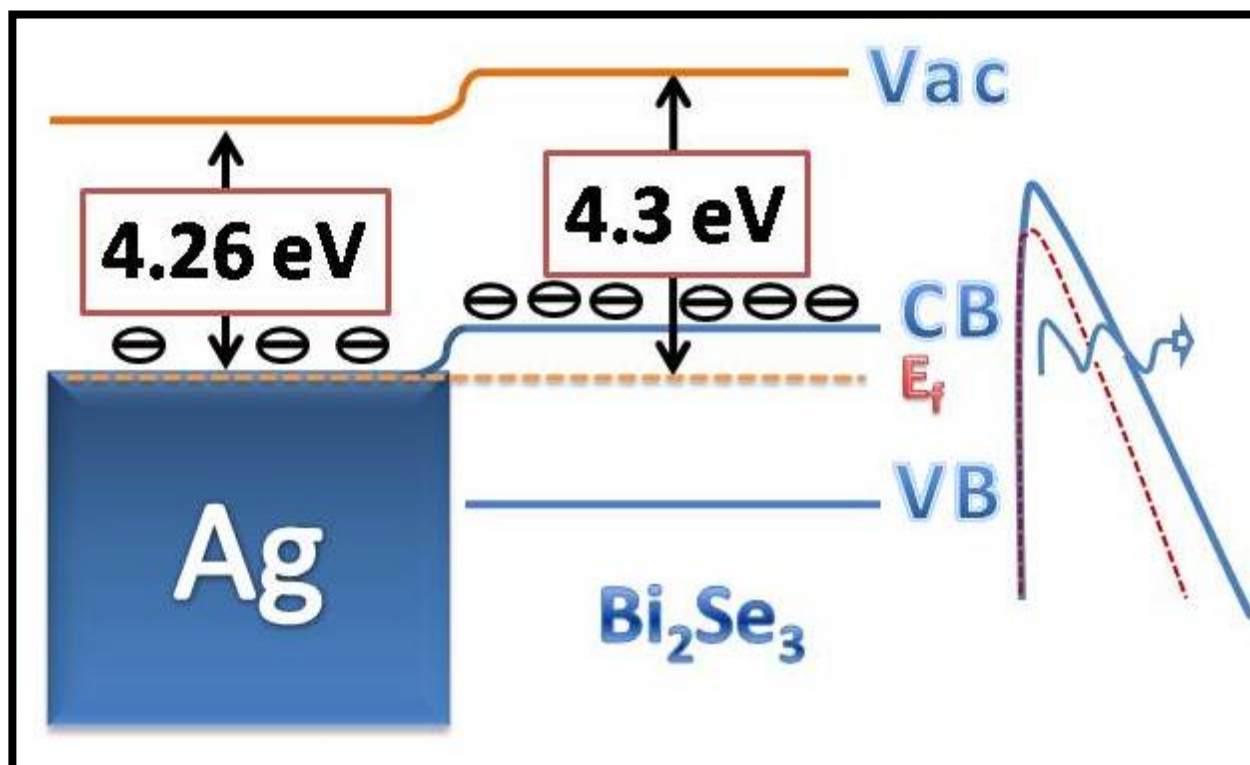

**Figure S1.** A schematic of the band alignment at the junction between Ag (metal) and  $\text{Bi}_2\text{Se}_3$  (semiconductor), indicating carrier injection into the semiconductor

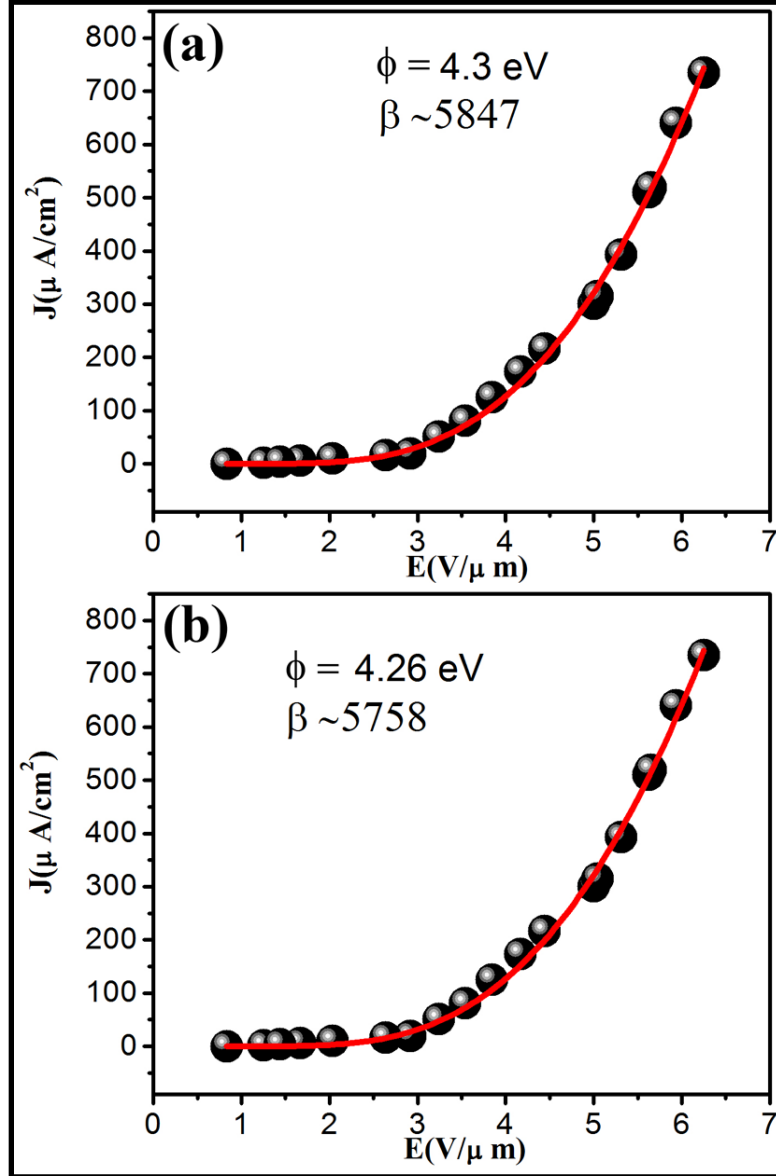

**Figure S2.** Plot of electric field vs current density and the same fitted by FN equation considering different work functions (a) 4.3 eV and (b) 4.26 eV; inset shows obtained enhancement factors

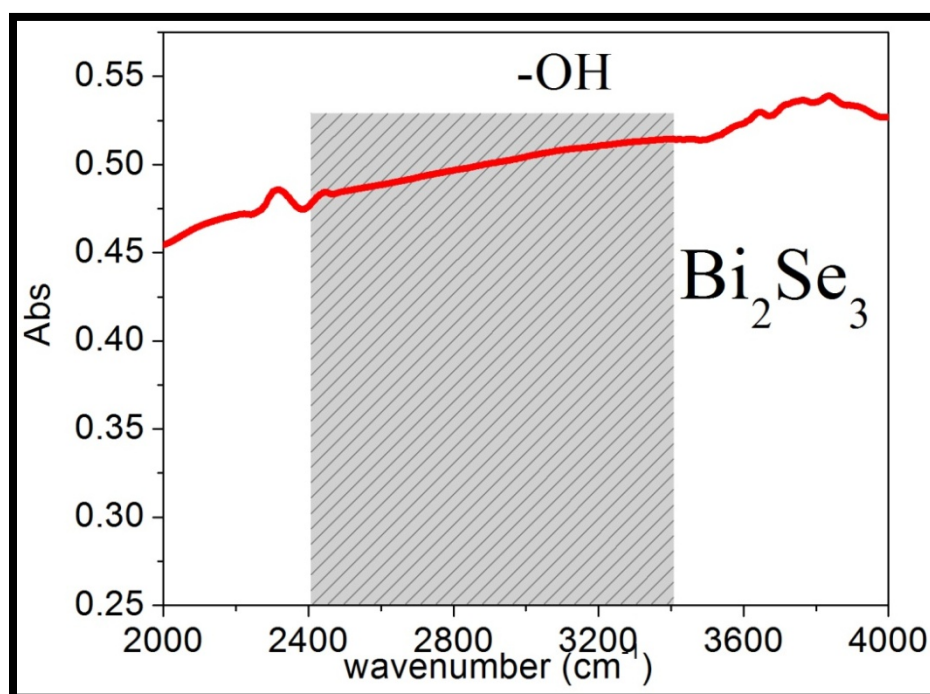

**Figure S3.** FT-IR spectrum of pure hierarchical Bi<sub>2</sub>Se<sub>3</sub> film showing no significance presence of -OH groups.
